# Supplementary material for: Inhibitory phosphorylation of Cdk1 mediates prolonged prophase I arrest in female germ cells and is essential for female reproductive lifespan
Source: PubMed Central journal article supplement — Cell Res. 2016 Oct 21;26(11):1212–25. doi: 10.1038/cr.2016.119 (PMC5099868; doi:10.1038/cr.2016.119), 2016-10-21
Supplement: cr2016119x3.pdf [file cr2016119x3.pdf]

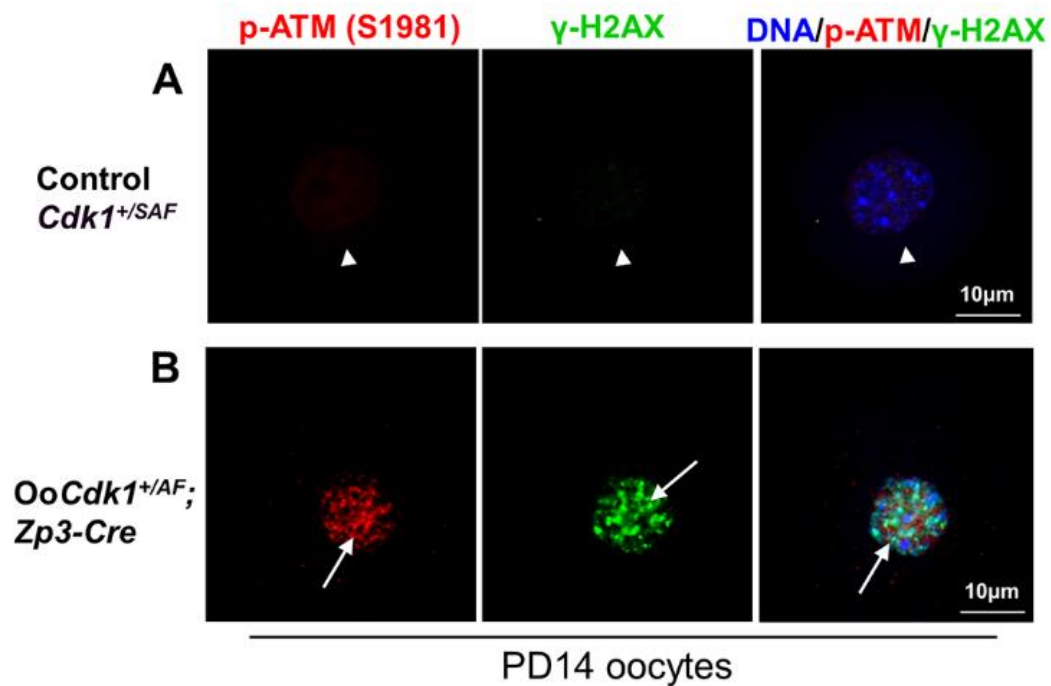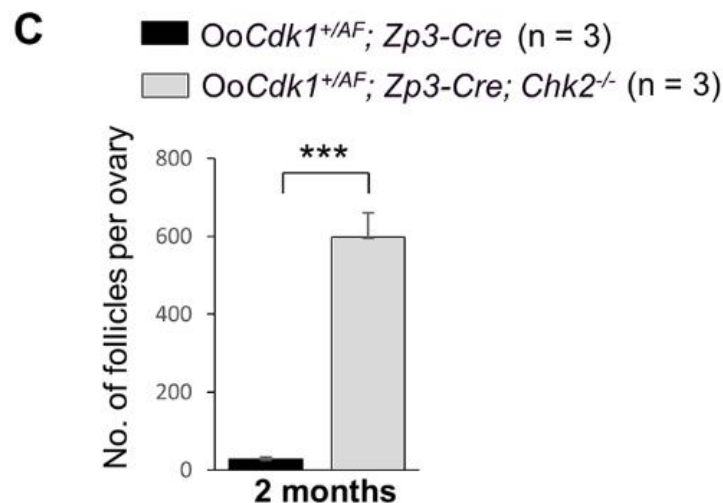

**Figure S3. Increased ATM activation in GV stage *OoCdk1<sup>+/AF</sup>; Zp3-Cre* oocytes and quantification of ovarian follicles in *OoCdk1<sup>+/AF</sup>; Zp3-Cre; Chk2<sup>-/-</sup>* mice.** Increased level of p-ATM (S1981) accompanied by increased  $\gamma$ -H2AX signal in PD14 *OoCdk1<sup>+/AF</sup>; Zp3-Cre* oocytes at GV stage (B, arrows), in comparison to PD14 control *Cdk1<sup>+/SAF</sup>* oocytes where there was almost no signal for p-ATM (S1981) or  $\gamma$ -H2AX (A, arrowheads). The experiments were repeated more than three times each, and representative images are shown. (C) Quantification of ovarian follicle numbers in 2 months *OoCdk1<sup>+/AF</sup>; Zp3-Cre* and *OoCdk1<sup>+/AF</sup>; Zp3-Cre; Chk2<sup>-/-</sup>* mice. The numbers of total follicles per ovary (mean  $\pm$  SEM) were quantified as described in *Materials and Methods*. The numbers of mice used (n) and results of statistical analyses are given. \*\*\* $P < 0.001$ .
